# Supplementary material
Source: Springer Nature journal article supplement (https://www.springermedizin.de/resource/supplementary/13229_2014_141_MOESM5_ESM.pdf/9676280)

a)

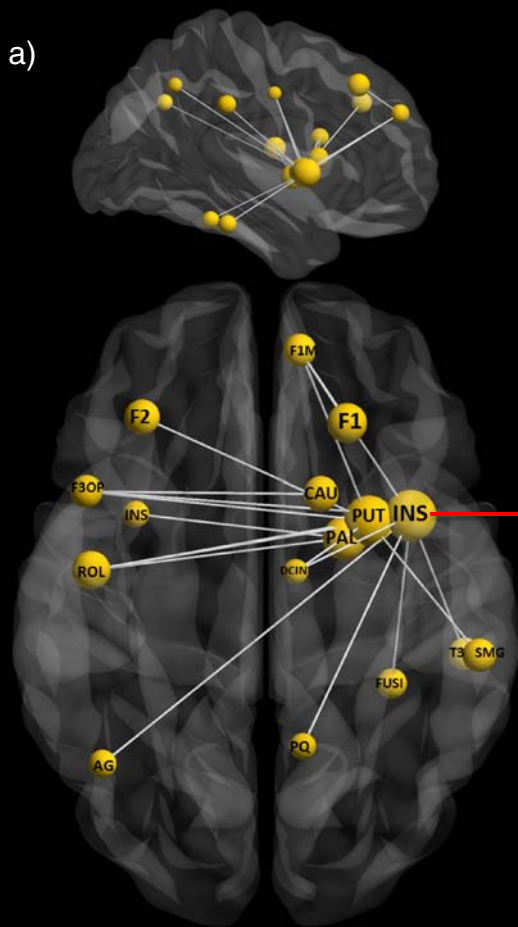

b)

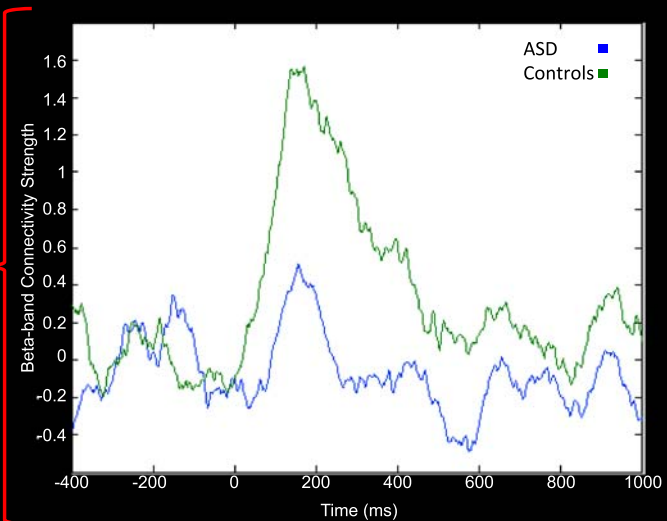

Supplement: MOESM5 [file 9676280]
